# Supplementary material
Source: PubMed Central journal article supplement (PMC10278995)
Supplement: mmc1.pdf [file mmc1.pdf]

# THE LANCET

## Supplementary appendix

This appendix formed part of the original submission. We post it as supplied by the authors.

Supplement to: Bailey C, Sanderson T, Townsley H, et al. Independent SARS-CoV-2 staff testing protected academic and health-care institutions in northwest London. *Lancet* 2023; published online June 19. [https://doi.org/10.1016/S0140-6736\(23\)00917-0](https://doi.org/10.1016/S0140-6736(23)00917-0).

Supplementary appendix for:

## Independent SARS-CoV-2 staff testing protected academic and health-care and institutions in Northwest London

\*Chris Bailey<sup>1,2,3</sup>, \*Theo Sanderson<sup>4,5</sup>, \*Hermaleigh Townsley<sup>1,2</sup>, Jacki Goldman<sup>6</sup>, James RM Black<sup>3,9</sup>, George Young<sup>7</sup>, Robert Goldstone<sup>8,10</sup>, Ashley S Fowler<sup>8</sup>, Sophia Ward<sup>8</sup>, Deborah J Jackson<sup>8</sup>, Laura Cubitt<sup>8</sup>, Vicky Dearing<sup>8</sup>, Olga O’Neil<sup>8</sup>, Marg Crawford<sup>8</sup>, Daniel Snell<sup>8</sup>, Makis Finadis<sup>8</sup>, Amelia Edwards<sup>8</sup>, Jimena Perez-Lloret<sup>8</sup>, Joshua Gahir<sup>1,2</sup>, Edward J Carr<sup>1</sup>, Andy Riddell<sup>11</sup>, Jim Aitken<sup>12</sup>, Karen Ambrose<sup>6</sup>, Chelsea Sawyer<sup>6</sup>, Nicola O’Reilly<sup>13</sup>, Simon Caidan<sup>1</sup>, Mary Y Wu<sup>14</sup>, Philip A Walker<sup>15</sup>, Steve Hindmarsh<sup>6</sup>, Michael Howell<sup>16</sup>, Andrew Jordan<sup>12</sup>, James Fleming<sup>12</sup>, Catherine Houlihan<sup>2</sup>, Eleni Nastouli<sup>2</sup>, Rachel Moores<sup>18</sup>, Desmond Hsu<sup>18</sup>, Padmasayee Papineni<sup>19</sup>, Tumena Corrah<sup>19</sup>, Richard Gilson<sup>20</sup>, James MacRae<sup>21</sup>, Michael Hubank<sup>17</sup>, Nicholas VanAs<sup>17</sup>, Samra Turajlic<sup>17,22</sup>, Rupert Beale<sup>9,24,25</sup>, Marcel Levi<sup>2</sup>, Crick COVID-19 Consortium, Sam Barrell<sup>1</sup>, Bryan Williams<sup>2,9</sup>, Steve Gamblin<sup>1</sup>, Jerome Nicod<sup>1,8</sup>, †Sonia Gandhi<sup>1,9,25</sup>, †David LV Bauer<sup>24,26</sup>, †Emma C Wall<sup>1,2</sup>, †Charles Swanton<sup>1,3,9</sup>

### Affiliations

1. Francis Crick Institute, London
2. University College London Hospitals NHS Foundation Trust
3. Cancer Evolution and Genome Instability Laboratory, The Francis Crick Institute, London
4. Malaria Biochemistry Laboratory, The Francis Crick Institute, London
5. Wellcome Trust Sanger Institute/COG-UK
6. Scientific Computing STP, The Francis Crick Institute, London
7. Applied Biotechnology Laboratory, The Francis Crick Institute, London
8. Advanced Sequencing Facility, The Francis Crick Institute, London
9. University College London
10. Bioinformatics and Biostatistics STP, The Francis Crick Institute, London
11. Flow Cytometry STP, The Francis Crick Institute, London
12. Information Technology Office, The Francis Crick Institute, London
13. Protein Chemistry STP, The Francis Crick Institute, London
14. COVID Surveillance Unit, The Francis Crick Institute, London
15. Structural Biology STP, The Francis Crick Institute, London
16. Highthroughput Screening laboratory, The Francis Crick Institute
17. Royal Marsden Hospitals NHS Foundation Trust
18. Royal Free London NHS Foundation Trust
19. London Northwest University Healthcare NHS Trust
20. Central and Northwest London NHS Foundation Trust
21. Metabolomics STP, The Francis Crick Institute, London
22. Cancer Dynamics Laboratory, The Francis Crick Institute, London
23. Cell Biology of Infection Laboratory, The Francis Crick Institute, London
24. Genotype to Phenotype Consortium UK (G2P)
  
25. Neurodegeneration Laboratory, The Francis Crick Institute, London
26. RNA Virus Replication Laboratory, The Francis Crick Institute, London

\*These authors contributed equally to this report

Correspondence to [emma.wall@crick.ac.uk](mailto:emma.wall@crick.ac.uk)

## Figure Legends

**Figure 1: The CCTP mirrors the dynamics of the first year of the COVID-19 pandemic in London. (A)** Prevalence of all SARS-CoV-2 infections in cases per 1000 resident, by London borough for the duration of the CCTP April 2020-May 2021, reported to the UK government testing service. Colour scale indicates increasing prevalence. FCI = Francis Crick Institute, RFH = Royal Free Hospital, CNWL = Camden and North West London NHS Trust, LNWUH = London North West University Hospitals, NMH = North Middlesex Hospital, RMH = Royal Marsden Hospital and UCLH – University College London Hospitals. **(B)** Numbers of daily tests April 2020-April 2022. Green bars show daily test count, yellow bars indicate positive tests. The period of the CCTP across NHS sites is indicated by the dark grey bar, continuation of asymptomatic testing at the FCI only indicated by light green bar. **(C)** Rolling 7-day incidence of SARS-CoV-2 infections across the all CTP sites April 2020-May 2021. Vertical lines indicate peak daily positive tests, smoothed line indicates 7 day rolling mean. **(D)** Pangolin lineage of all SARS-CoV-2 positive PCR tests, as a percentage of the total positive tests per calendar month. Colours indicate lineage, bars indicate months from April 2020-March 2022. **(E)** Phylogenetic tree showing variation in all SARS-CoV-2 lineages isolated from the FCI testing pipeline 2020-2022, coloured by pandemic Variant of Concern (VOC). **(F)** Detection lead time in days for three VOC Alpha (yellow), Delta (blue) and Omicron (green) on the CCTP before declaration of VOC status by the WHO.

**Supplementary Figure 1: Asymptomatic testing captures early infections and protects NHS green sites early in the pandemic. (A)** Top panel: Numbers of daily SARS-CoV-2 tests by site, representing the proportions contributing to the peak pandemic waves 2020-2021. Coloured lines indicate different sites. Bottom panel: Numbers of daily positive SARS-CoV-2 tests by site, representing the proportions contributing to the peak pandemic waves 2020-2021. Coloured bars indicate proportion of positives contributed to by each testing site. Data gap between 24-28<sup>th</sup> December 2021 due to maintenance and staff holidays, no test results reported on these days (shown as a grey bar). **(B)** Rolling 7day incidence of SARS-CoV-2

infections by Crick testing pipeline site April 2020-May 2021. RFH = Royal Free Hospital, CNWL = Camden and North West London NHS Trust, LNWUH = London North West University Hospitals, NMH = North Middlesex Hospital, RMH = Royal Marsden Hospital and UCLH – University College London Hospitals. **(C)** Incident rate ratio of positive tests comparing symptomatic and asymptomatic sites. Green site refers to NHS sites following NHSE IPC guidelines for safer surgery and cancer treatment. **(D)** Median Ct value for all tests across the CCTP between asymptomatic and symptomatic sites. **(E)** Cumulative incidence of infections with a Ct<15 between asymptomatic and symptomatic sites.

**Supplementary Figure 2: Enhanced COVID-19 workplace testing supports productivity in a large biomedical research institute.** **(A)** Positive SARS-CoV-2 tests at the FCI, as a proportion of all conducted tests, overlaid with building occupancy. Grey columns indicate daily tests (right axis), dark blue lines show the rolling 7-day incidence of positive tests (left axis). Horizontal red line indicates rolling 7-day average building occupancy April 2020-March 2022 (right axis). **(B)** Weekly building occupancy shown as a proportion of peak 2019 occupancy. Green bars indicate data across 2020, orange 2021 and blue 2022. Data gaps indicate national stay at home orders where the building was closed to non-essential workers and swipe card data not routinely collected. **(C)** Incidence of daily reported SARS-CoV-2 infections in the London borough of Camden (grey, left axis) matched to daily positive SARS-CoV-2 infections in employees of the Francis Crick Institute (blue, right axis) April 2020-March 2022.

**Supplementary Table 1: Effective population size and incidence rate ratios (IRR) for NHS Trust sites**

| Site   | Effective population size | IRR  | 95% CI       |
|--------|---------------------------|------|--------------|
| London | 9,002,448                 | 1    | -            |
| UCLH   | 10,933                    | 7.4  | (6.65-8.26)  |
| RMH    | 4,080                     | 12.9 | (11.1-14.8)  |
| LNWUH  | 8,774                     | 2.1  | (1.62-2.60)  |
| CNWL   | 6,773                     | 0.65 | (0.46-1.10)  |
| RFH    | 10,818                    | 9.9  | (8.98-10.89) |

## Methods

### *PCR testing and sequencing*

Individual samples across the CCTP were assigned a barcode identifier associated with the sample donor and test site and processed as previously described<sup>1</sup>. Briefly, occupational health screening swabs were inactivated and stored in virus transport media (VTM), RNA extracted and tested using both the SARS-CoV-2 PCR kit (BGI), subsequently changing to the TaqPath COVID-19 CE-IVD RTPCR Kit (ThermoFisher) in December 2020<sup>1</sup>. Following a positive result, RNA was re-extracted from stored VTM sample and Illumina sequencing libraries prepared using the ARTIC amplicon protocol following the CoronaHIT method [ <https://doi.org/10.1186/s13073-021-00839-5> ]. Following Illumina sequencing, FASTQ files were processed using the ViralRecon nf-core pipeline [ <https://nf-co.re/viralrecon> ]. Consensus FASTA files were subsequently uploaded to COG-UK, where lineage was assigned using PANGOLIN (v3.1.9). Consensus FASTA files were aligned using MAFFT and a phylogenetic tree was constructed and resampled using bootstrapping (n=100) from multiple sequence alignments using IQ-Tree and visualised using the R package ape.<sup>2</sup>

## Data handling & analysis

All barcodes from the CCTP were sub-divided into test sites prior to analysis. Cumulative Covid-19 case numbers as of June 30 2021 for each London borough as reported to Public Health England were retrieved from the 'Coronavirus (COVID-19) Cases and Vaccinations' dataset within the London Datastore. London Borough boundary data were obtained from data.gov.uk, contained in a data set extracted from the freely available Official Ordnance Survey boundary-line product (<https://data.gov.uk/dataset/f4481b10-3618-4d87-ac84-22d8ee242878/london-boroughs>). Maps were generated in R, using the rgdal and tidyverse packages.

Incident rate ratio estimates were calculated by dividing the number of positive PCR tests within the first four months of the pandemic by the effective population served by that trust. The effective population was defined from the employee count for each Trusts' annual report for 2020-2021: UCLH –10,933, (<https://www.uclh.nhs.uk/about-us/what-we-do/our-performance/annual-report-annual-plan-and-quality-account>), Royal Marsden Hospitals NHS Trust (RMH)–4,080 (<https://www.royalmarsden.nhs.uk/about-royal-marsden/quality-and-safety/regulatory-information/annual-report>), Royal Free Hospital NHS Trust (RFH)–10,818 (<https://www.royalfree.nhs.uk/about-us/corporate-information-and-accountability/annual-reports/>), London North-West University Hospitals NHS Trust (LNWUH)–8,774 (<https://www.lnwh.nhs.uk/annual-report-and-accounts/>), Camden and North West London NHS Trust (CNWL) –6,773 (<https://www.cnwl.nhs.uk/about/planning-performance-and-reports>).

Ct data were summarised by both site testing strategy and variant. Continuous variables were summarised using medians, interquartile and range, and compared using Wilcoxon log rank test.

## **Data sharing**

Sequencing data for all positive samples are publicly available through COG-UK resources.

Data tables and code for figures can be found here: <https://github.com/bailey-c/THELANCET-D-23-01260>

## **Acknowledgements**

This research was funded in whole, or in part, by the Wellcome Trust [FC011104, FC011233, FC001030, FC001159, FC001827, FC001078, FC001099, FC001169]. For the purpose of Open Access, the author has applied a CC BY public copyright licence to any Author Accepted Manuscript version arising from this submission. The authors would like to thank Sir Paul Nurse, Jules Marczack, Bobbi Clayton, Gita Mistry and all the research staff who volunteered to work on the COVID-19 testing pipeline at the Francis Crick Institute. The authors would also like to thank the staff of the NIHR Clinical Research Facility at UCLH including Dr Mike Brown, Martin Bruce, Kirsty Adams, Miguel Alvarez and Marivic Ricamara, and Dr Mike Gandy at the Health Services Laboratory.

## **Funding**

This work was supported by core funding from the Francis Crick Institute, which receives its core funding from Cancer Research UK (FC011104, FC011233, FC001030, FC001159, FC001827, FC001078, FC001099, FC001169), the UK Medical Research Council (FC011104, FC011233, FC001030, FC001159, FC001827, FC001078, FC001099, FC001169), and the Wellcome Trust (FC011104, FC011233, FC001030, FC001159, FC001827, FC001078, FC001099, FC001169). This work was additionally undertaken at UCLH/UCL who received a proportion of funding from the National Institute for Health Research (NIHR) University College London Hospitals Department of Health's NIHR Biomedical Research Centre (BRC). EW, VL and BW are supported by the Centre's funding scheme.

TS is supported by a Sir Henry Wellcome Post-doctoral Fellowship from the Wellcome Trust grant 210918/Z/18/Z

The funders of the study had no role in study design, data collection, data analysis, data interpretation, or writing of the report. The corresponding authors had full access to all the data and the final responsibility to submit for publication.

### **Additional references**

1. Aitken J, Ambrose K, Barrell S, et al. Scalable and robust SARS-CoV-2 testing in an academic center. *Nat Biotechnol* 2020; **38**(8): 927-31.
2. Nguyen LT, Schmidt HA, von Haeseler A, Minh BQ. IQ-TREE: a fast and effective stochastic algorithm for estimating maximum-likelihood phylogenies. *Mol Biol Evol* 2015; **32**(1): 268-74.

### **Author List**

#### **Crick COVID-19 pipeline testing pipeline**

Aaron Sait, Abhinay Ramaprasad, Abigail Perrin, Acely Garza-Garcia, Adam Sateriale, Adrienne Sullivan, Aileen Nelson, Aishani Saha, Akshay Madoo, Alana Burrell, Aleksandra Pajak, Alessandra Gaiba, Alex Dobre, Alice Rossi, Alida Avola, Alison Dibbs, Alison Taylor-Beadling, Alize Proust, Almaz Huseynova, Amar Pabari, Amelia Edwards, Amy Strange, Ana Cardoso, Ana Perez Caballero, Anabel Guedan, Anastacio Teixeira, Anastasia Moraiti, Andrea Emslie-Henry, Andreas Wack, Andrew Buckton, Andrew Levett, Andrew Rowan, Angela Rodgers, Ania Kucharska, Anja Schlott, Annachiara Rosa, Annalisa D'Avola, Anne O'Garra, Anthony Gait, Antonio Casal, Antony Fearn, Antony Horwood, Arabella Hornung, Areda Elezi, Ashley Fowler, Beatriz Montaner, Belen Gomez Dominguez, Ben Witcher, Bernard Siow, Berta Terre Torras, Beth Hoskins, Billy Sanger, Bishara Marzook, Bob Ludwig, Bobbi Clayton, Bruno Frederico, Caetano Reis e Sousa, Caitlin Barns-Jenkins, Carles Bosch, Carlos Minutti, Caroline Oedekoven, Catharina Wenman, Catherine F. Houlihan, Catherine Lambe, Catherine Moore, Charles Swanton, Chelsea Sawyer, Chi Wong, Chloe Roustan, Chris Ekin, Christelle Soudy, Christophe Queval, Christopher Earl, Claire Brooks, Claire Thomas, Claire Walder, Clare Beesley, Claudio Bussi, Clementina Cobolli Gigli, Clinda Puvirajasinghe, Cristina CotobalMartin, Cristina Lombardelli, Daiva Poniskaitiene, Dan Fitz, Dania Kewbank, Daniel Snell, Danielle Miller, Dara Davison, David Moore, David Sota, Davide Zecchin, Deb Jackson, Deborah Hughes, Dhira Joshi, Dhruva Biswas, Dimitrios Evangelopoulos, Dominique Bonnet, Edel C. McNamara, Edina Schweighoffer, Effie Taylor, Efthymios Fidanis, Eleni Nastouli, Elizabeth Foxall, Elizabeth



Horton, Elizabeth Li, Ellen Knuepfer, Emma Ashton, Enrica Calvani, Enzo Poirier, Erik Sahai, Fairouz Ibrahim, Fatima Sardar, Faye Bowker, Fernanda Subtil, Fiona Byrne, Fiona Hackett, Fiona Kinnis, Fiona McKay, Fiona Roberts, Francesca Torelli, Frank Alves , Ganka Bineva-Todd, Gee Yen Shin, Genevieve Barr, Geoff Kelly, George Kassiotis, George Pyrgos, Gill Adams, Giorgia Anacreonte, Gita Mistry, Goran Tomic, Graeme Hewitt, Graham Clark, Gunes Taylor, Hadija Trojer, Han Ngoc Ho, Hannah Easter, Harriet B. Taylor, Harry Glen, Hector Huerga Encabo, Heledd Davies, Helen Flynn, Helen M. Golding, Hon Wing Liu, Hui Gong, Ilaria Gori, Ilenia D'Angelo, India Bah-Nelson, Jack Coomes, Jack Smales, Jack Waterford , Jacki Goldman, Jacqueline Hoyle, Jake Murphy , James Cormack, James Fleming, James MacRae, James Polke, James Turner, Jamie Barrett , Jane Hughes, Jane Walker, Janet Abreu , Jean O'Leary, Jernej Ule, Jerome Nicod, Jessica Diring, Jessica Olsen, Jill Saunders, Jim Aitken, Jimena Perez-Lloret, Joachim M. Matz, Joanna Campbell, Joe Shaw, John Matthews, Johnathan Canton, Joshua Hope, Joshua Wright, Joyita Mukherjee, Judith Heaney, Julian Gannon, Julian Zagalak, Julie Marczak, Karen Ambrose, Karen Vousden, Karine Rizzoti, Kat Snelgrove, Katarzyna Sala, Katja Finsterbusch, Kayleigh Richardson, Keeleigh McKeogh, Konstantinos Kousis, Kylie Montgomery, Laura Churchward, Laura Cubitt, Laura Knipe, Laura McCoy, Laura Peces-Barba Castano, Laura Reed, Lauren Wynne, Leigh Jones, Liam Gaul, Lisa Levett, Louisa Steel, Louise Busby, Louise Howitt, Louise Kiely, Lucia Moreira-Teixeira, Lucia Prieto-Godino, Lucy Jenkins, Luis King, Luis Valenica, Luiz Carvalho, Luke Nightingale, Luke Williams, Lyn Healy, Magali Perrault, Mahbubur Rahman, Makis Fidanis, Malgorzata Broncel, Mani Venkatesan, Manuela Melchionda, Marc Pollitt, Marcel Levi, Marg Crawford, Margaux Silvestre, Maria Greco, Mariam Jamal-Hanjani, Mariana Grobler, Mariana Silva Dos Santos, Marie Sjothun, Mark Johnson, Marlon Martinez, Martina Pilatova, Martina Ragno, Mary Wu, Mathew Sargent, Matthew Singer, Matthew Williams, Mauro Miranda, Maximiliano Gutierrez, Maxine Holder, Meghan Poulten, Melanie Turner, Melvyn Yap, Mercedes Cabrera Jarana, Michael Blackman, Michael Buck, Michael Howell, Michael Hubank, Michael Nagliati, Michele Tan, Michelle Lappin, Michelle Lehner, Mike Buck, Mimmi Martensson, Ming Jiang, Ming-Han C. Tsai, Ming-Shih Hwang, Minoo Razi, Mint Htun, Miriam Molina-Arcas, Moira Spyer, Monica Diaz-Romero, Moritz Treeck, Muhammad Saeed, Murad Miah, Namita Patel, Natalie Bevan, Natalie Chandler, Neil Justin, Neil Osborne, Nick Carter, Nick Lewis, Nicola Cook, Nicola O'Reilly, Nigel Peat, Nikita Komarov, Nisha Bhardwaj, Nnennaya Kanu, Oana Paun, Ogo Obi, Ok-Ryul Song, Olga O'Neill, Pablo Romero Clavijo, Patricia Figueiredo-Nunes, Patrick Davis, Patrick Toolan-Kerr, Paul Driscoll, Paul Grant, Paul Kotzampaltiris, Paul Nurse, Paula Ordonez Suarez, Peter Cherepanov, Peter Johnson, Phil Walker, Phillip Bawumia, Pierre Santucci, Poppy Atkins, Prisca Hill, Priscilla Benjamin, Qu Chen, Rachael Instrell, Rachel Ambler, Rachel Rosenthal, Rachel Ulferts, Rachel Zillwood, Raffaella Carzaniga, Rajnika

Hirani, Raju Veeriah, Rajvee Shah Punatar, Raquel Taveira-Marques, Raveena Morar, Richard Byrne, Rob Moore, Robert Goldstone, Robyn Labrum, Rodrigo Batalha, Ross Hall, Rowenna Roberts, Roy Poh, Rupert Beale, Rupert Faraway, Sally Cottrell, Sam Balakrishnan, Sam Barrell, Sam Loughlin, Sam Sade , Samantha Atkinson, Samuel McCall, Samutheswari Balakrishnan, Sandeep Sandhar, Sandra Segura-Bayona, Sarah Manni, Savita Nutan, Selvaraju Veeriah, Seti Grambas, Shahnaz Bibi, Sharon Stoughton, Sharon Vanloo, Silvana Guioli, Simon Butterworth, Simon Caidan, Sofanit Mebrate, Solene Debaisieux, Sonia Gandhi, Sophie Ridewood, Sophie Ward, Souradeep Basu, Stacey-Ann Lee, Stefania Crotta, Stefania Federico, Steinar Halldorsson, Stephanie Nofal, Steve Gamblin, Steve Hindmarsh, Stuart Kirk, Sugera Hashim, Susanne Herbst, Suzanne Harris, Svend Kjaer, Tammy Krylova, Tania Marchbank, Tea Toteva, Tessa Bertran, Theo Sanderson, Theresa Higgins, Thomas Martinez, Thomas Snoeks, Timothy Budd, Tinashe Matambanadzo, Titilayo Abiola, Todd Fallesen, Tom Cullup, Tom Taylor, Val Pye, Vanessa Silva, Venizelos Papayannopoulos, Veronique Calleja, Vicky Dearing, Vijaya Ramachandran, Vittorio Barbe, Wai Keong Wong, Wei-Ting Lu, Ying Thong Low, Yiran Wang, Yogen Patel, Zena Collins, Zheng Xiang, Zoe Allen, Zoe Tautz-Davis

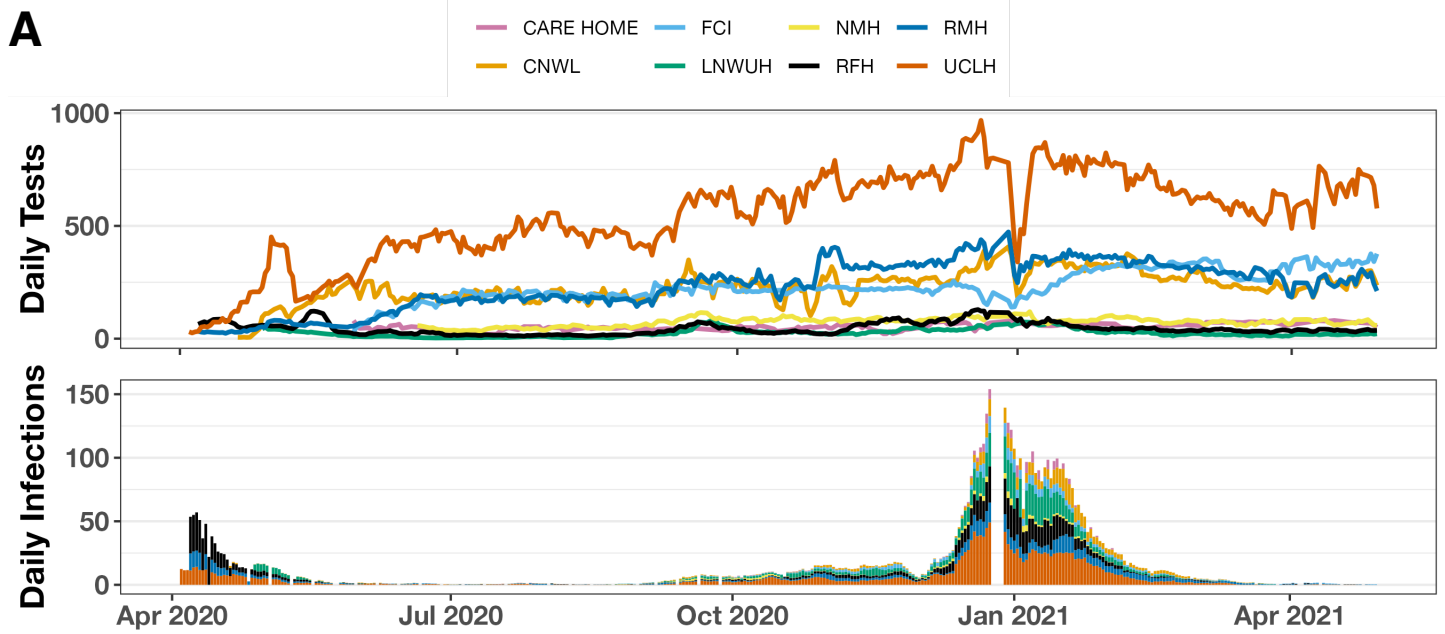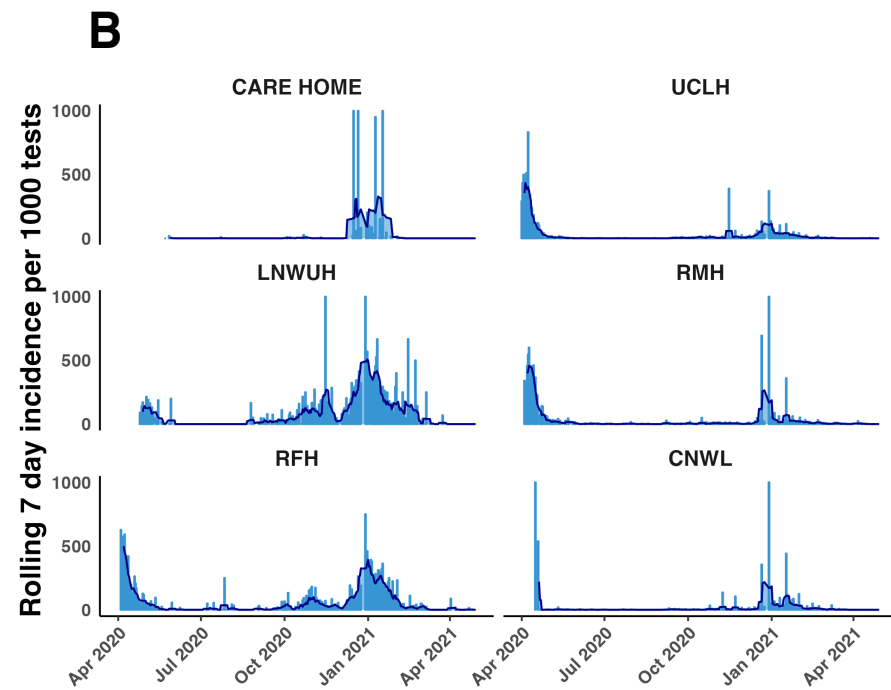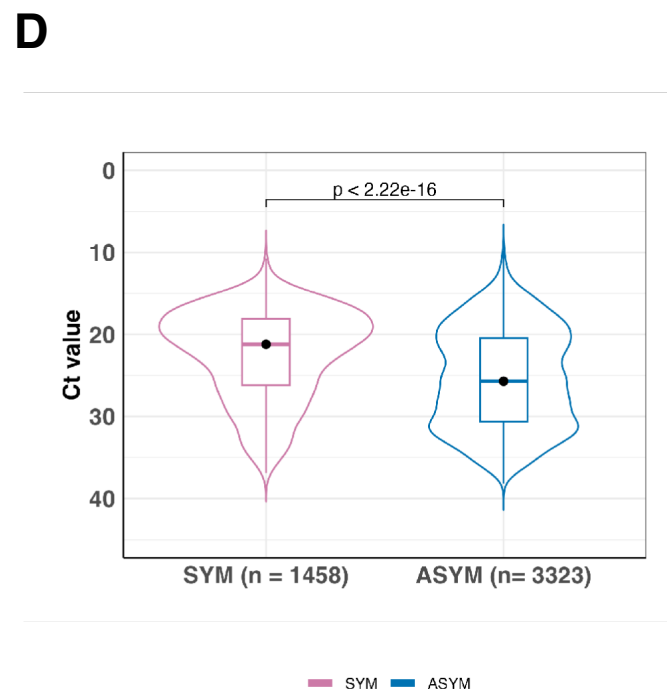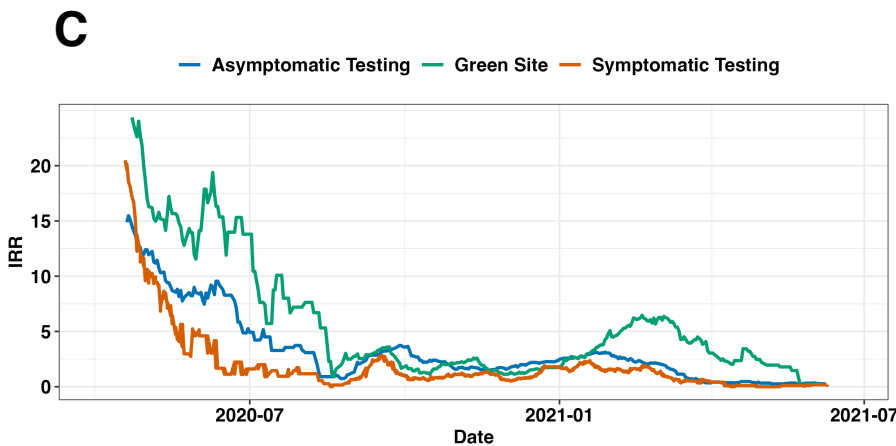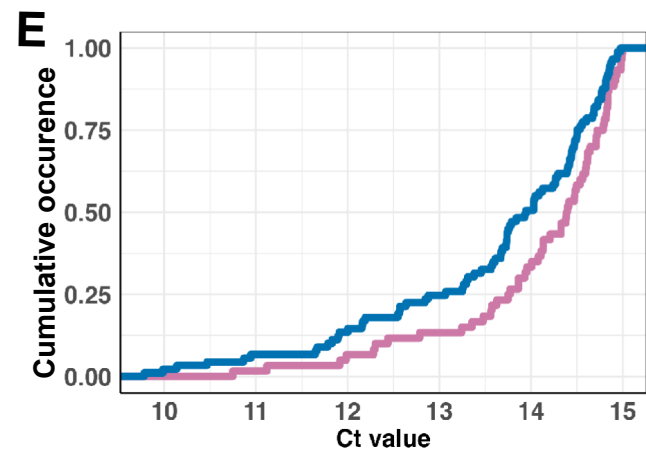

### Supplementary Figure 1: Asymptomatic testing captures a greater proportion of highly infectious staff than responsive symptomatic testing alone

(A-top panel) Numbers of daily SARS-CoV-2 tests by sites, indicated by coloured line. (A-bottom panel) Numbers of daily positive SARS-CoV-2 tests by site. Data gap 24-28th December 2021 due to CCTP maintenance. (B) Rolling 7day incidence of positive SARS-CoV-2 tests by site April 2020-May 2021. (C) Incident rate ratio of positive tests comparing symptomatic and asymptomatic sites. Green site refers to NHS sites following NHSE IPC guidelines for safer surgery and cancer treatment. (D) Median Ct value for all tests across the CCTP between asymptomatic and symptomatic-only sites. (E) Cumulative occurrence of positive tests with a Ct<15 between asymptomatic and symptomatic sites.

**A**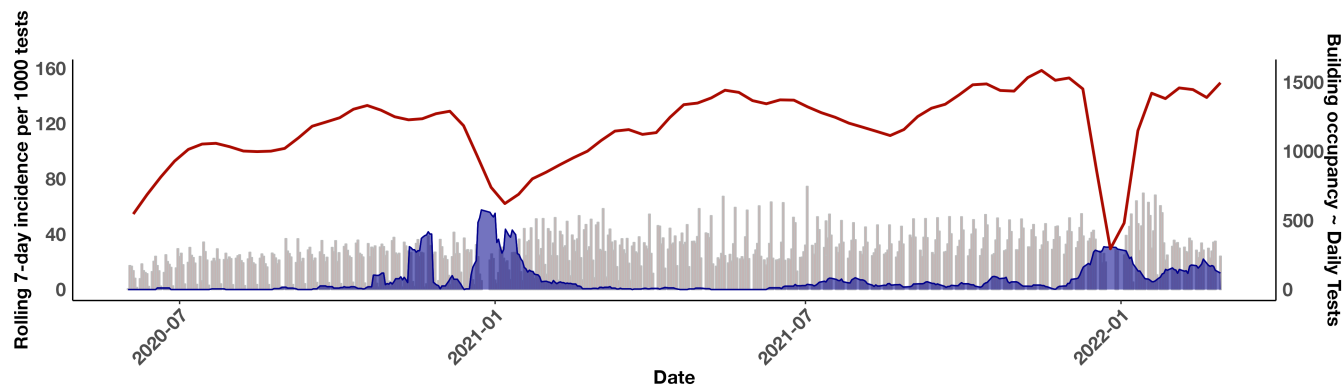**B**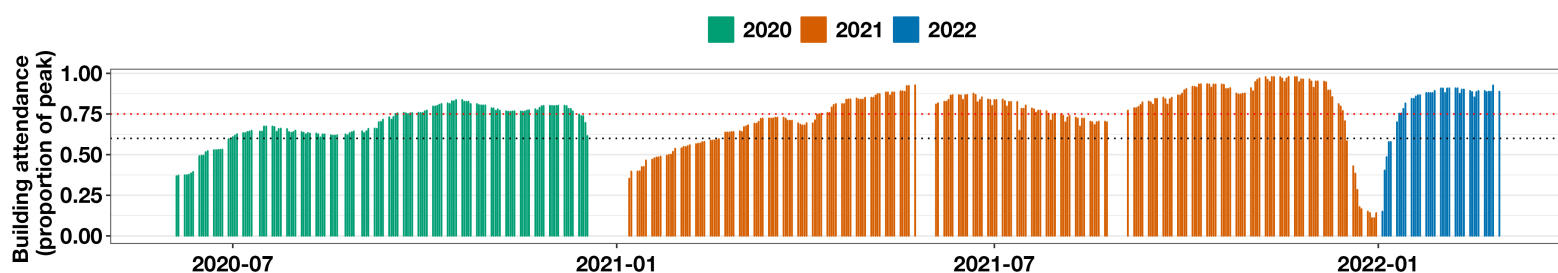**C**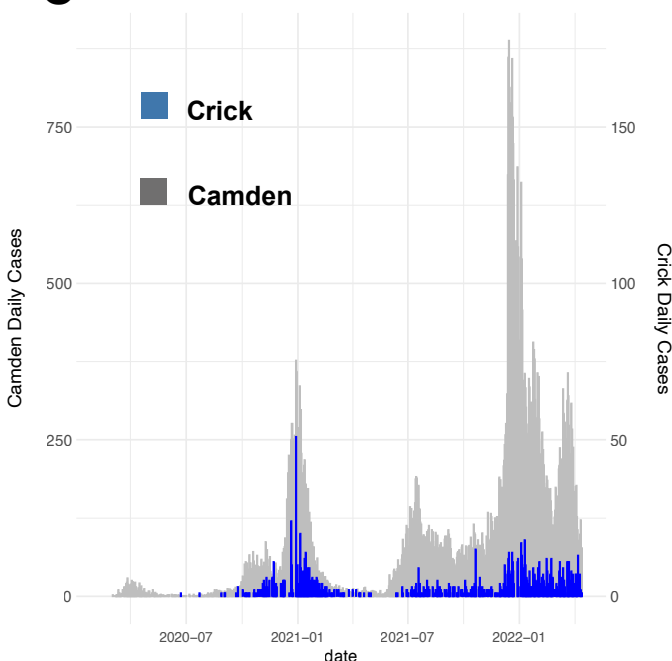**D**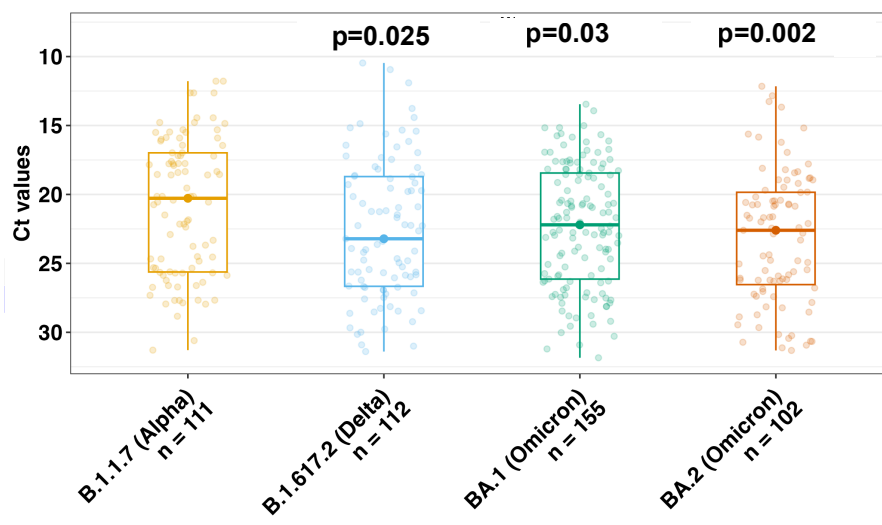

## Supplementary Figure 2: Enhanced COVID-19 workplace testing supports in-person working in a large biomedical research institute

**(A)** Positive SARS-CoV-2 tests at the FCI, as a proportion of all conducted tests, overlaid with building occupancy. Grey columns indicate daily tests (right axis), dark blue lines show the rolling 7-day incidence of positive tests (left axis). Horizontal red line indicates rolling 7-day average building occupancy (right axis).

**(B)** Weekly building occupancy shown as a proportion of peak 2019 occupancy. Green bars indicate data across 2020, orange 2021 and blue 2022. Data gaps indicate national stay at home orders where the building was closed to non-essential workers and swipe card data not routinely collected. **(C)** Incidence of daily reported SARS-CoV-2 infections in the London borough of Camden (grey, left axis) matched to daily positive SARS-CoV-2 infections in employees of the Francis Crick Institute (blue, right axis) April 2020-March 2022.

**(D)** Distribution and median Ct value for all tests reported across FCI staff 2020-2022, stratified by VOC. Univariate comparisons between Delta, BA.1 and BA.2 with Alpha using Mann-Whitney test.
